# Supplementary material for: Psychometric testing of the SAFE (Socially Ascribed intersectional identities For Equity) questionnaire
Source: Research Square preprint supplement (doi:10.21203/rs.3.rs-8613437/v1), 2026-02-06
Supplement: Supplementary file 1 [file fbf2cfd2b9f121c2b8ff5d34.docx]

**Psychometric testing of the SAFE (Socially Ascribed intersectional identities For Equity) questionnaire**

Supplementary File

Table of Contents

[SAFE (Socially Ascribed intersectional identities For Equity) Questionnaire 2](#_Toc210125435)

[Part 1: Sex and Gender 2](#_Toc210125436)

[Part 2: Sexuality and Sexual Orientation 4](#_Toc210125437)

[Part 3: Cultural Context 6](#_Toc210125438)

[Part 4: Ability and Physical Characteristics 8](#_Toc210125439)

[Part 5 Socioeconomic Status 10](#_Toc210125440)

[The Canadian Campus Wellbeing Survey (CCWS) 13](#_Toc210125441)

# SAFE (Socially Ascribed intersectional identities For Equity) Questionnaire

*Source*: Lee, E. Y., Airton, L., Jung, E., Lim, H., Latimer-Cheung, A., Szto, C., ... & Yi, K. J. (2024). Development and validation of the SAFE (Socially Ascribed intersectional identities For Equity) questionnaire. *Acta Psychologica*, 245, 104235. <https://doi.org/10.1016/j.actpsy.2024.104235>

## Part 1: Sex and Gender

1. What sex were you assigned at birth on your original birth certificate?
2. Female
3. Male
4. Prefer not to answer
5. Select response(s) that best describe your current gender identity. Select all that apply.
6. Woman or girl
7. Man or boy
8. Nonbinary or similar
9. Culturally specific gender identity (e.g., Two-Spirit)
10. Questioning/unsure
11. Prefer not to answer
12. Not listed (please specify: )

With the next two questions, we are trying to learn how people sometimes see you, whether or not their assumptions are correct.

1. When you have not stated your pronoun(s), which pronoun(s) do acquaintances or strangers typically use to refer to you? Select all that apply.
2. She/her/hers
3. He/him/his
4. They/them/theirs
5. Prefer not to answer
6. Do not know
7. Not listed (please specify: )
8. The next question asks about your *gender expression*. This includes things like the clothes that you wear, your hair or facial hair, and whether you wear make-up. It also includes how you move your body, how you behave and speak, how you hold your body, the work you do, and your hobbies or interests. Your gender expression can impact how you are seen and treated by others, especially if it is not what other people typically expect.

**Regardless of your gender identity, how acquaintances or strangers would typically (e.g., at school or work) describe:**

|  | Feminine | | | Androgynous | Masculine | | | Prefer not to answer | Do not know |
| --- | --- | --- | --- | --- | --- | --- | --- | --- | --- |
| Very | Mostly | Somewhat | Equally feminine and masculine | Somewhat | Mostly | Very |
| the way you move your body? |  |  |  |  |  |  |  |  |  |
| the way you speak or the depth/volume of your voice? |  |  |  |  |  |  |  |  |  |
| how you state your views and opinions? |  |  |  |  |  |  |  |  |  |
| how you groom and dress? |  |  |  |  |  |  |  |  |  |
| your job or work? | Removed due to irrelevance to undergraduate students | | | | | | | | |
| your hobbies or interests? |  |  |  |  |  |  |  |  |  |
| how you express your feelings? |  |  |  |  |  |  |  |  |  |

## Part 2: Sexuality and Sexual Orientation

1. Select response(s) that best describe your sexual orientation. Select all that apply.
2. Asexual
3. Bisexual
4. Gay
5. Lesbian
6. Pansexual
7. Queer
8. Straight/Heterosexual
9. Culturally specific sexual orientation (e.g., Two-Spirit) (please specify: )
10. Prefer not to answer
11. Another term best describes my sexual orientation (please specify: )
12. Are you currently in a romantic or sexual relationship?
13. Yes
14. No
15. Prefer not to answer

**IF A is selected on Q2.**

3.1 Are you open with the following people about your romantic or sexual relationship(s)?

Note: Select “Not applicable” if any of the options are not relevant to you.

|  | Not applicable | No | Some | Most | Yes | Prefer not to answer |
| --- | --- | --- | --- | --- | --- | --- |
| Parents/guardians |  |  |  |  |  |  |
| Siblings |  |  |  |  |  |  |
| Relatives |  |  |  |  |  |  |
| Close friends |  |  |  |  |  |  |
| School friends |  |  |  |  |  |  |
| Acquaintances |  |  |  |  |  |  |

**IF B is selected on Q2.**

3.2 Are you typically comfortable talking about who you are or are not attracted to, with the following people?

Note: Select “Not applicable” if any of the options are not relevant to you.

|  | Not applicable | No | Some | Most | Yes | Prefer not to answer |
| --- | --- | --- | --- | --- | --- | --- |
| Parents/guardians |  |  |  |  |  |  |
| Siblings |  |  |  |  |  |  |
| Relatives |  |  |  |  |  |  |
| Close friends |  |  |  |  |  |  |
| School friends |  |  |  |  |  |  |
| Acquaintances |  |  |  |  |  |  |

With the next question, we are trying to learn about how people sometimes see you, whether or not their assumptions are correct.

1. **Regardless of your actual sexual orientation, how would acquaintances or strangers typically describe your romantic or sexual relationship(s)?**

*Note*: an acquaintance is someone you know slightly but who is not a close friend.

1. Straight/Heterosexual
2. Gay or Lesbian
3. Bisexual
4. None of the above
5. Prefer not to answer
6. Do not know

## Part 3: Cultural Context

1. Are you perceived or treated as a person of colour?
   1. Yes
   2. No
   3. Prefer not to answer

**IF A is selected on Q1, continue with Q2-Q4.**

**IF B-C is selected on Q1, prompt the survey to Part 4.**

1. Which group(s) do you consider that you belong to? Select all that apply.
2. Indigenous
3. Black (African, Afro-Caribbean, African-Canadian descent)
4. East Asian (Chinese, Korean, Japanese, Taiwanese descent)
5. Latino, Latina, Latine, or Latinx (Latin American, Hispanic descent)
6. Middle Eastern (Arab, Persian, West Asian descent, e.g., Afghan, Egyptian, Iranian descent, etc.)
7. South Asian (e.g., East Indian, Pakistani, Sri Lankan, Indo-Caribbean descent, etc.)
8. Southeast Asian (Filipino, Vietnamese, Cambodian, Thai, other Southeast Asian descent)
9. Not listed (please specify: )
10. Groups not indicated above and not white
11. Prefer not to answer

With the next two questions, we are trying to learn about how people sometimes see you, whether or not their assumptions are correct.

1. How would acquaintances or strangers typically perceive you (whether or not they are correct)? Select all that apply.
2. Indigenous
3. Black (African, Afro-Caribbean, African-Canadian descent)
4. East Asian (Chinese, Korean, Japanese, Taiwanese descent)
5. Latino, Latina, Latine or Latinx (Latin American, Hispanic descent)
6. Middle Eastern (Arab, Persian, West Asian descent, e.g., Afghan, Egyptian, Iranian descent, etc.)
7. South Asian (e.g., East Indian, Pakistani, Sri Lankan, Indo-Caribbean descent, etc.)
8. Southeast Asian (Filipino, Vietnamese, Cambodian, Thai, other Southeast Asian descent)
9. Not listed (please specify: )
10. Groups not indicated above and not white
11. Prefer not to answer
12. For each prompt, check the boxes that are most applicable to you. You can select multiple boxes on each row.

**Regardless of the racial or ethnic group(s) that you consider yourself to belong to, acquaintances or strangers would typically think that…**

*Note*: an acquaintance is someone you know slightly but who is not a close friend.

|  | Yes | No | Prefer not to answer | Do not know |
| --- | --- | --- | --- | --- |
| You do not understand English |  |  |  |  |
| You were born outside of Canada |  |  |  |  |
| You practice a particular religion |  |  |  |  |
| You speak a particular language |  |  |  |  |
| You know about a particular cultural food, type of music, dance, sport, etc. |  |  |  |  |

## Part 4: Ability and Physical Characteristics

1. Do you have a disability or impairment that is apparent to acquaintances or strangers?

*Note*: an acquaintance is someone you know slightly but who is not a close friend.

1. Yes, in most contexts
2. Yes, in some contexts
3. No
4. Prefer not to answer

**IF A-B is selected on Q1, continue with Q2-Q5:**

**IF C-D is selected on Q1, continue with Q5:**

1. Do you identify as a person who: Select all that apply.
2. Is disabled
3. Has a disability
4. Lives with a disability
5. Is impaired
6. Is neurodiverse
7. Prefer not to answer
8. Not listed (please specify: )
9. What type of disability or impairment do you have?

Note: Select all that apply.

1. Sensory (related to hearing or seeing)
2. Physical
3. Related to learning
4. Related to cognition
5. Related to communication
6. Chronic pain or illness
7. Neurodiversity
8. Prefer not to say
9. Not listed (please specify: )
10. Looking back, from what age did disability or impairment begin to impact your life experiences and opportunities?
11. Preschool (0–5 years)
12. School age (6–18 years)
13. Early adulthood (19–30 years)
14. Mid-life (31–50 years)
15. 51 years and up
16. Prefer not to answer
17. Do not know

With the next question, we are trying to learn about how people sometimes see you, whether or not their assumptions are correct.

1. For each prompt, check the boxes that are most applicable to you. You can select multiple boxes on each row.

**Regardless of your disability or impairment, acquaintances or strangers would typically think that:**

*Note*: an acquaintance is someone you know slightly but who is not a close friend.

|  | Yes | No | Prefer not to answer | Do not know |
| --- | --- | --- | --- | --- |
| You have good posture |  |  |  |  |
| You exercise regularly |  |  |  |  |
| You have a healthy body size |  |  |  |  |
| You can control your bodily movements |  |  |  |  |
| You do not require assistance to move around, get to places, or perform the range of life’s activities |  |  |  |  |
| You can be trusted to make your own decisions |  |  |  |  |
| You have valuable skills and knowledge to offer |  |  |  |  |

## Part 5 Socioeconomic Status

1. What are the first four characters of your postal code?
2. What is your mother’s highest level of education?
3. Less than high school graduation
4. Graduated high school
5. Non-university post-secondary certificate or diploma
6. University degree or certificate – Bachelor’s degree
7. University degree or certificate – Master’s or Doctoral degree
8. Post-secondary professional degree (e.g., JD, MD)
9. Prefer not to answer
10. Other
11. What is your father’s highest level of education?
12. Less than high school graduation
13. Graduated high school
14. Non-university post-secondary certificate or diploma
15. University degree or certificate – Bachelor’s degree
16. University degree or certificate – Master’s or Doctoral degree
17. Post-secondary professional degree (e.g., JD, MD)
18. Prefer not to answer
19. Other
20. What is the size of your household or family unit?
21. 1 person
22. 2 persons
23. 3 persons
24. 4 persons
25. 5 persons
26. 6 persons
27. 7 persons or more
28. Prefer not to answer
29. This question asks about your household income.

What is your best estimate of combined annual income of your **parents**, before taxes and deductions, from all sources during the previous calendar year ending in December?

1. Less than $15,000
2. $15,000 to less than $25,000
3. $25,000 to less than $35,000
4. $35,000 to less than $50,000
5. $50,000 to less than $75,000
6. $75,000 to less than $100,000
7. $100,000 to less than $125,000
8. $125,000 to less than $150,000
9. $150,000 to less than $250,000
10. $250,000 to less than $500,000
11. $500,000 or more
12. Prefer not to answer
13. Do you (or someone in your household) own a…

|  | Yes | No | Prefer not to answer |
| --- | --- | --- | --- |
| Single-family house/apartment |  |  |  |
| Property other than the place of residence (e.g., cottage/cabin, vacation home, rental, or business) |  |  |  |
| Trailer/RV/camper |  |  |  |
| Motorized watercraft or sailboat |  |  |  |
| Membership of an athletic club (e.g., golf club, tennis club, sailing club, riding club, hockey club, other highly-specialized sport club) |  |  |  |

1. How often do you typically engage in the following activities?

|  | ≥ once every week | Once a month | Several times a year | Once a year | Never | Prefer not to answer |
| --- | --- | --- | --- | --- | --- | --- |
| Dining at or ordering in from a restaurant (not including fast food chains) |  |  |  |  |  |  |
| Cultural activities with fees (e.g., performances, visiting galleries, museums) |  |  |  |  |  |  |

1. How often do you typically engage in the following activities?

|  | ≥ Three times a year | Twice a year | Once a year | Less than once per year | Never | Prefer not to answer |
| --- | --- | --- | --- | --- | --- | --- |
| Domestic travel (not for work) |  |  |  |  |  |  |
| International travel (not for work) |  |  |  |  |  |  |

With the next question, we are trying to learn about how people sometimes see you, whether or not their assumptions are correct.

1. For each prompt, check the boxes that are most applicable to you. You can select multiple boxes on each row.

**Regardless of your SES, acquaintances or strangers would typically think that:**

*Note*: an acquaintance is someone you know slightly but who is not a close friend.

|  | Yes | No | Prefer not to answer | Do not know |
| --- | --- | --- | --- | --- |
| You are well-educated |  |  |  |  |
| You receive sufficient financial support from your parents (e.g., tuition fees, allowance, living expenses, car, etc.) |  |  |  |  |
| You eat a healthy diet |  |  |  |  |
| You are well-dressed |  |  |  |  |

# The Canadian Campus Wellbeing Survey (CCWS)

Source: Weatherson, K., Kwan, M., Ramanathan, S., & Faulkner, G. (2019). Development of the Canadian Campus Wellbeing Survey (CCWS) (CCWS Technical Report Series, Issue 1). <www.ccws-becc.ca>

1. The Canadian Census identifies the following categories in its Census of the Population. Please indicate how you self-identify.

This self-identification is not intended as an indication of one’s place of origin, citizenship, language or culture and recognizes that there are differences both between and among subgroups of persons of colour. If you are of mixed-descent, please indicate this by selecting all that apply, rather than using the “other” line unless parts of your self-identification do not appear in this list.

1. Indigenous Peoples of Canada
2. Indigenous (outside of Canada)
3. Arab
4. Black
5. Chinese (including Mainland China, Hong Kong, Macau and Taiwan)
6. Filipino
7. Japanese
8. Korean
9. Latin, Central, or South American (e.g. Brazilian, Chilean, Columbian, Mexican)
10. South Asian (e.g. Indian, Pakistani, Sri Lankan, etc.)
11. Southeast Asian (e.g. Cambodian, Indonesian, Laotian Vietnamese, etc)
12. West Asian (e.g. Afghan, Iranian, Syrian, etc)
13. White
14. If none of the above, please specify:
15. What is your gender identity?
16. Woman
17. Non-binary
18. Two-Spirit
19. Man
20. I prefer not to answer
21. Do you identify as:
22. Heterosexual/Straight
23. Gay/Lesbian
24. Bisexual/Pansexual
25. Asexual
26. Queer
27. Questioning/Unsure
28. If none of the above, please specify:
29. I prefer not to answer
30. Do you have any of the following disabilities or ongoing medical conditions that have affected your everyday functioning? Select all that apply.
31. Physical disability
32. Blind/Visually impaired
33. Deaf/Hard of Hearing
34. Mental Health Condition
35. Neurological (learning disability, ASD, Traumatic Brain Injury, ADHD, etc.)
36. Chronic Health Condition (Crohn’s, HIV, etc.)
37. Another condition not listed above
38. Not applicable -I don’t have a disability or ongoing medical condition
39. I prefer not to answer
40. What is the highest level of formal education obtained by your parent(s)/guardian(s)?
41. High school or less (e.g. GED, high school diploma, primary or elementary completion, etc.)
42. Completed a college program (e.g. Apprenticeship, certificate or college diploma, etc.)
43. Completed a university degree (e.g. Bachelor)
44. Completed a graduate or other professional degree (e.g. Master, PhD)
45. I don’t know o I prefer not to answer
46. Not applicable

# 
